# Supplementary material for: Long-distance migration and venting of methane after marine hydrate dissociation
Source: Research Square preprint supplement (doi:10.21203/rs.3.rs-2604587/v1), 2023-03-03
Supplement: Supplementary file 1 [file e31c49d3ece50a11b109d4eb.docx]

Supplementary material: Fig. 1 Seismic line from figure 2b (inline 12398) with the interpreted (part a) and modelled position of BHSZduring the LGM and BHSZM (part b).


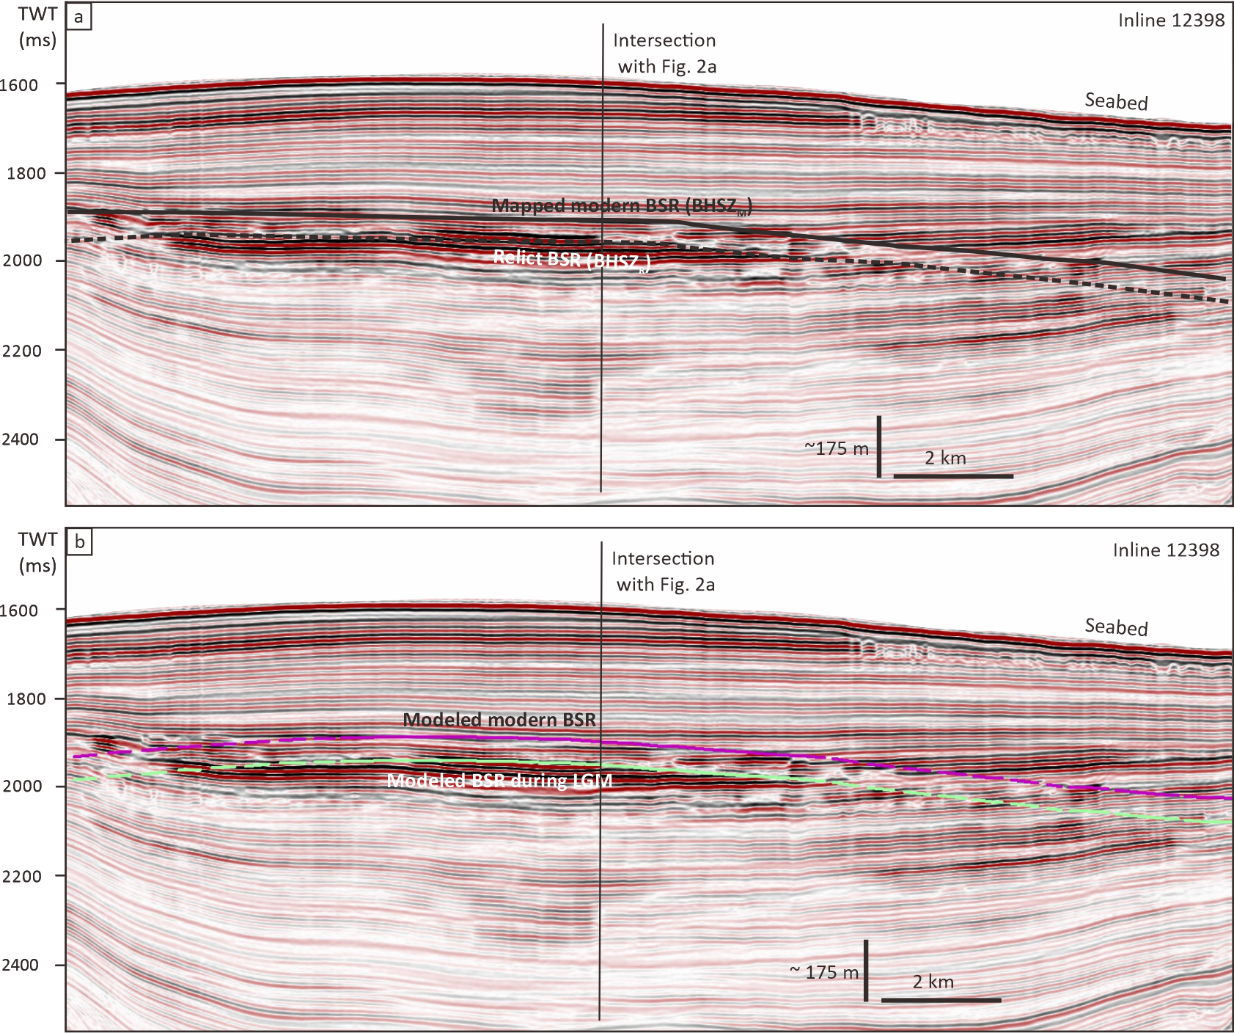


Supplementary material: Fig. 2 a) Seabed map showing the location of one of the 23 giant pockmarks. b) Representative seismic line across the pockmark.


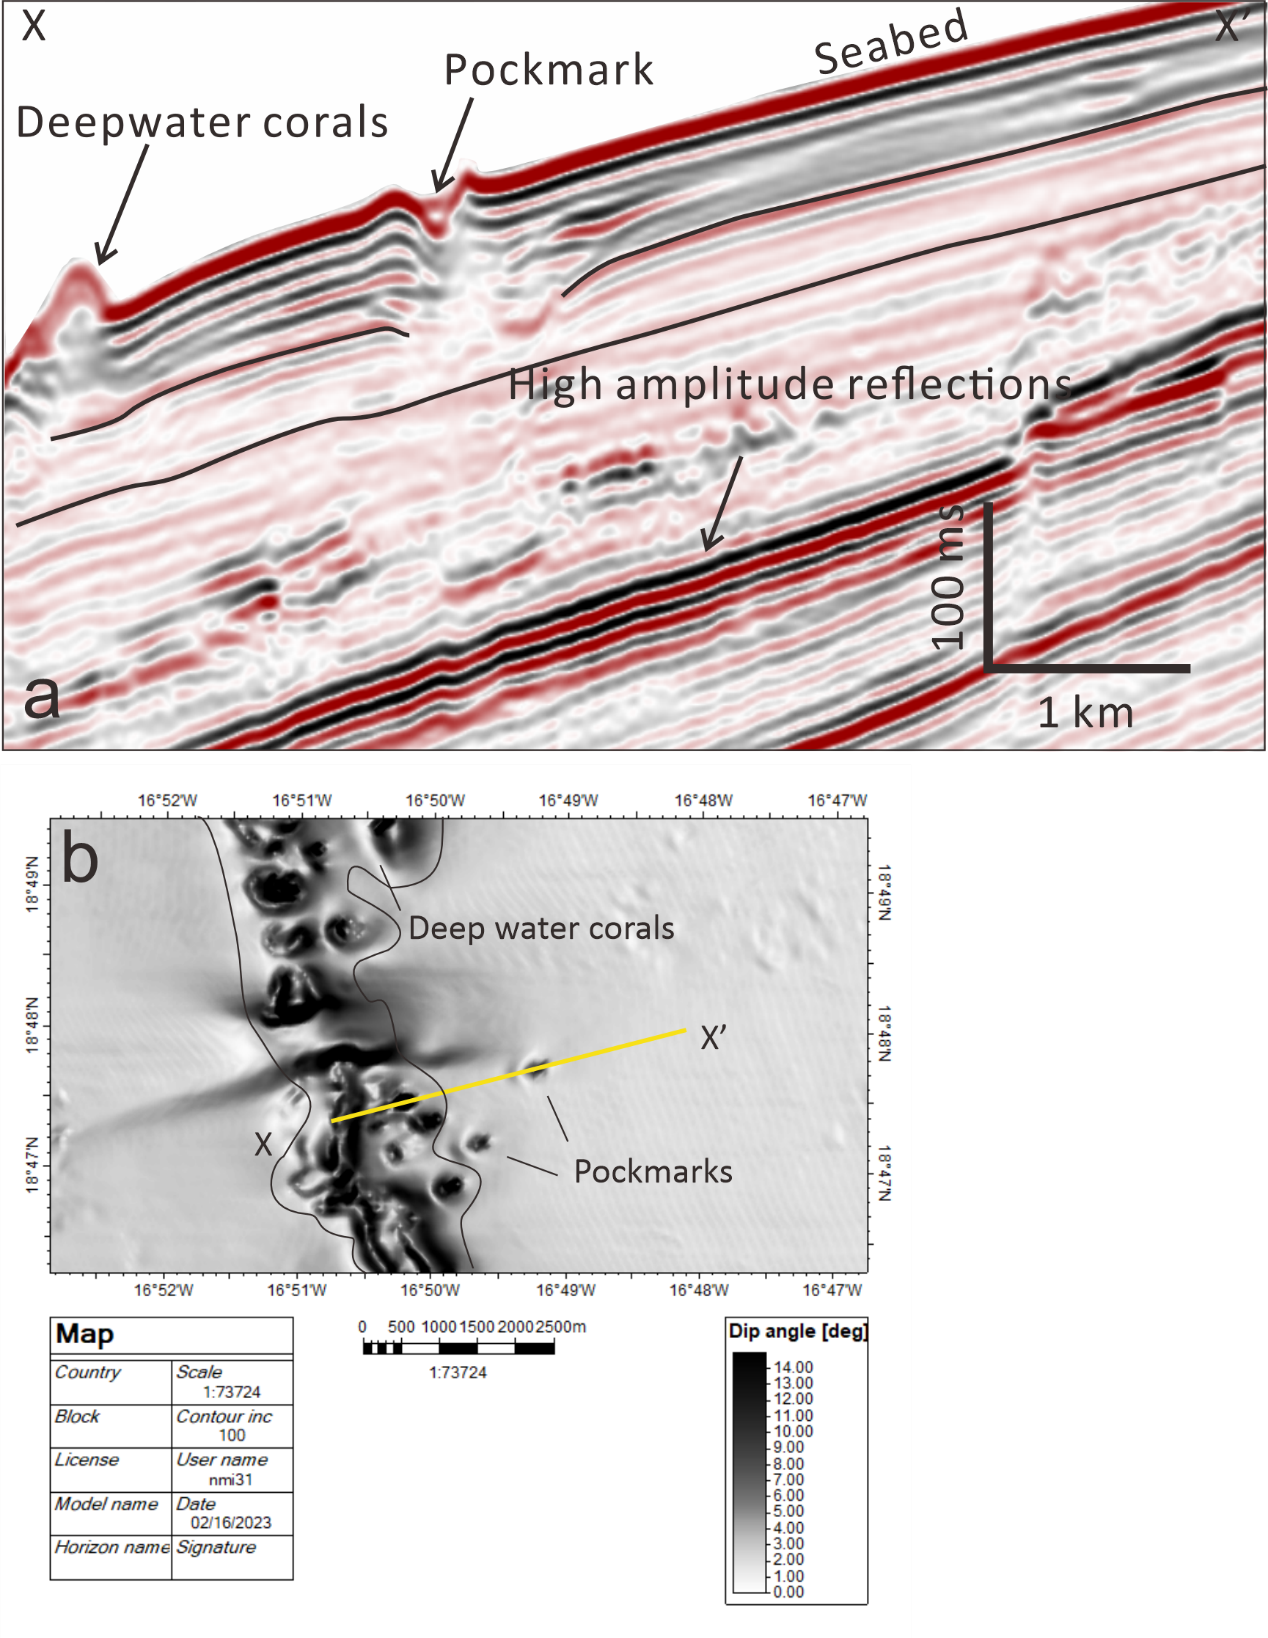


Supplementary material: Fig. 3 Calculated thickness of the theoretical gas hydrate stability zone (GHSZ)1 with the locations of studies documenting similar features to those described here. Green dots – seismic evidence for existence of simple graded margins2–10; red dots – seismic evidence for the landward limit of marine hydrate where the dip of the BHSZ > the dip of stratal4,6–9,11–17; blue dots – BHSZ is approximately concordant with strata on the continental slope4,6–8,10–12,14,15,18; black dots – pockmarks significantly (up to10s of km) beyond the landward limit of marine hydrate6,15,16.


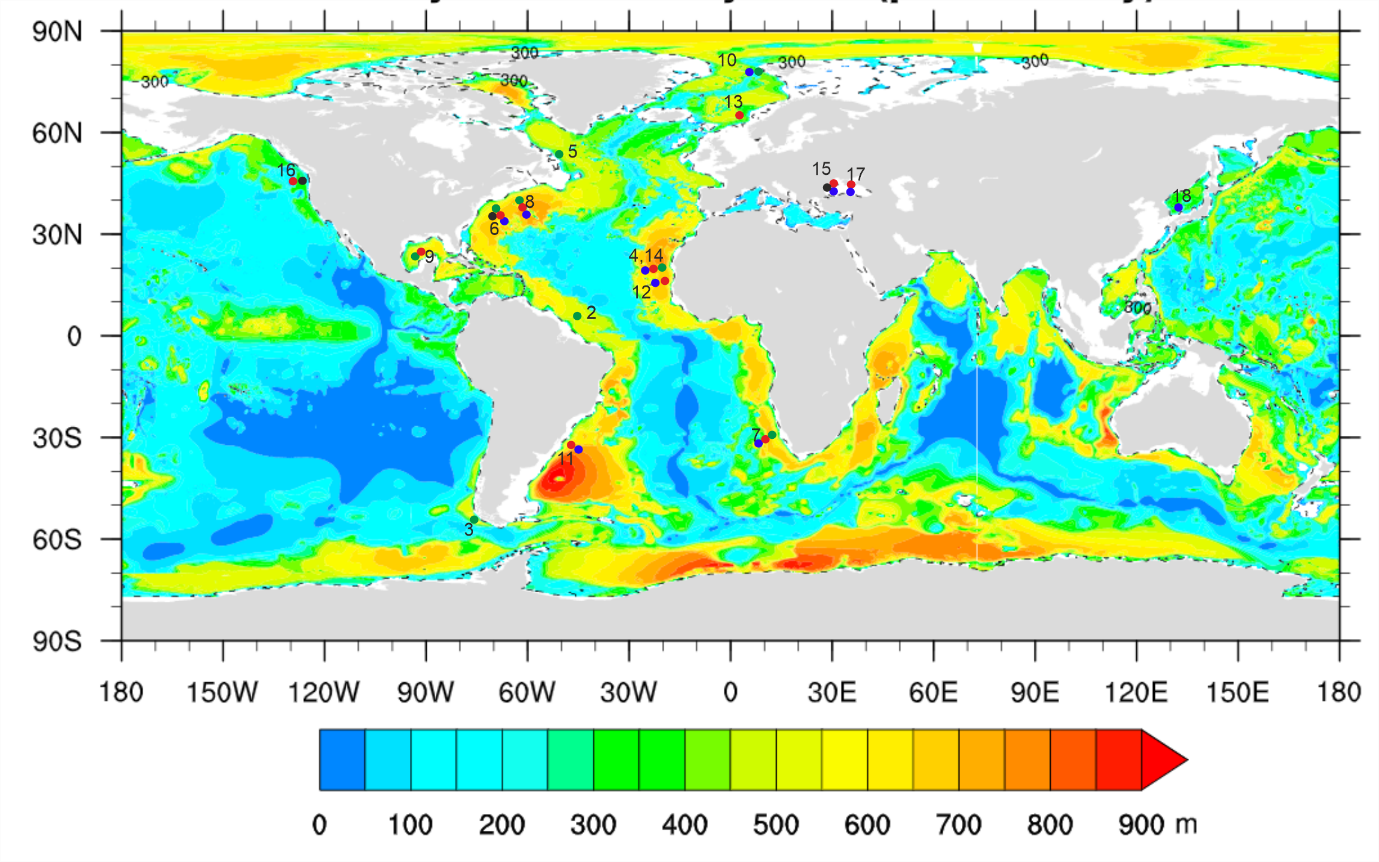


References

1. Kretschmer, K., Biastoch, A., Rüpke, L. & Burwicz, E. Modeling the fate of methane hydrates under global warming. *Global Biogeochem Cycles* **29**, 610–625 (2015).

2. Pirmez, C. & Imran, J. Reconstruction of turbidity currents in Amazon Channel. *Mar Pet Geol* **20**, 823–849 (2003).

3. Sylvester, Z., Pirmez, C. & Cantelli, A. A model of submarine channel-levee evolution based on channel trajectories: Implications for stratigraphic architecture. *Mar Pet Geol* **28**, 716–727 (2011).

4. Li, A., Davies, R. J. & Mathias, S. Methane hydrate recycling offshore of Mauritania probably after the last glacial maximum. *Mar Pet Geol* **84**, 323–331 (2017).

5. PIPER, D. J. W., DEPTUCK, M. E., MOSHER, D. C., HUGHES CLARKE, J. E. & MIGEON, S. Erosional and Depositional Features of Glacial Meltwater Discharges on the Eastern Canadian Continental Margin. in *Application of the Principles of Seismic Geomorphology to Continental-Slope and Base-of-Slope Systems: Case Studies from Seafloor and Near-Seafloor Analogues* 61–80 (SEPM (Society for Sedimentary Geology), 2012). doi:10.2110/pec.12.99.0061.

6. Brothers, D. S. *et al.* Seabed fluid expulsion along the upper slope and outer shelf of the U.S. Atlantic continental margin. *Geophys Res Lett* **41**, 96–101 (2014).

7. Wenau, S., Spiess, V. & Zabel, M. Giant Seafloor Depressions Caused by Slope Failures and Bottom Currents on the Namibia Continental Margin. *Geochemistry, Geophysics, Geosystems* **22**, (2021).

8. Ruppel, C. D. *et al.* US Atlantic Margin Gas Hydrates. in *World Atlas of Submarine Gas Hydrates in Continental Margins* 287–302 (Springer International Publishing, 2022). doi:10.1007/978-3-030-81186-0_24.

9. Prather, B. E. Calibration and visualization of depositional process models for above-grade slopes: a case study from the Gulf of Mexico. *Mar Pet Geol* **17**, 619–638 (2000).

10. Osti, G., Waghorn, K. A., Waage, M., Plaza-Faverola, A. & Ferré, B. Evolution of contourite drifts in regions of slope failures at eastern Fram Strait. *arktos* **5**, 105–120 (2019).

11. Ketzer, M. *et al.* Gas hydrate dissociation linked to contemporary ocean warming in the southern hemisphere. *Nat Commun* **11**, 3788 (2020).

12. Davies, R. J. & Clarke, A. L. Methane recycling between hydrate and critically pressured stratigraphic traps, offshore Mauritania. *Geology* **38**, 963–966 (2010).

13. Bünz, S. & Mienert, J. Acoustic imaging of gas hydrate and free gas at the Storegga Slide. *J Geophys Res Solid Earth* **109**, (2004).

14. Ang Li. Three-dimensional Seismic Analysis and Modelling of Marine Hydrate Systems Offshore of Mauritania. PhD Thesis. (2017).

15. Riboulot, V. *et al.* Control of the geomorphology and gas hydrate extent on widespread gas emissions offshore Romania. *Bulletin de la Société géologique de France* **188**, 26 (2017).

16. Merle, S. G. *et al.* Distribution of Methane Plumes on Cascadia Margin and Implications for the Landward Limit of Methane Hydrate Stability. *Front Earth Sci (Lausanne)* **9**, (2021).

17. Riedel, M. *et al.* Controls on Gas Emission Distribution on the Continental Slope of the Western Black Sea. *Front Earth Sci (Lausanne)* **8**, (2021).

18. Yoo, D. G. *et al.* Occurrence and seismic characteristics of gas hydrate in the Ulleung Basin, East Sea. *Mar Pet Geol* **47**, 236–247 (2013).
